# Supplementary material
Source: publisher figshare collection journal article supplement (https://tandf.figshare.com/articles/dataset/_/7491911)
Supplement: Supplementary file 1 [file 1]

| ID | t0       | t1       | Z | d |
|----|----------|----------|---|---|
| 1  | 0        | 1.321387 | 0 | 0 |
| 1  | 1.321387 | 2.68494  | 1 | 1 |
| 2  | 0        | 4.876792 | 0 | 1 |
| 3  | 0        | 0.168606 | 0 | 0 |
| 3  | 0.168606 | 0.379777 | 1 | 1 |
| 4  | 0        | 1.1906   | 0 | 0 |
| 5  | 0        | 5.009839 | 0 | 0 |
| 6  | 0        | 0.000744 | 0 | 1 |
| 7  | 0        | 0.308846 | 0 | 0 |
| 8  | 0        | 0.1      | 0 | 0 |
| 8  | 0.1      | 1.6223   | 1 | 1 |
| 9  | 0        | 1.692956 | 0 | 0 |
| 10 | 0        | 0.1      | 0 | 0 |
| 10 | 0.1      | 1.285001 | 1 | 1 |
| 11 | 0        | 4.417227 | 0 | 1 |
| 12 | 0        | 1.153156 | 0 | 1 |
| 13 | 0        | 0.1      | 0 | 0 |
| 13 | 0.1      | 0.382807 | 1 | 1 |
| 14 | 0        | 7.644253 | 0 | 0 |
| 15 | 0        | 0.1      | 0 | 0 |
| 15 | 0.1      | 1.410373 | 1 | 1 |
| 16 | 0        | 0.894271 | 0 | 1 |
| 17 | 0        | 0.152143 | 0 | 0 |
| 17 | 0.152143 | 4.701031 | 1 | 0 |
| 18 | 0        | 0.881456 | 0 | 0 |
| 19 | 0        | 0.491453 | 0 | 0 |
| 19 | 0.491453 | 2.981507 | 1 | 1 |
| 20 | 0        | 0.781483 | 0 | 0 |
| 20 | 0.781483 | 2.53463  | 1 | 1 |
| 21 | 0        | 0.784902 | 0 | 1 |
| 22 | 0        | 0.315816 | 0 | 0 |
| 23 | 0        | 5.570405 | 0 | 0 |
| 23 | 5.570405 | 8        | 1 | 0 |
| 24 | 0        | 2.267373 | 0 | 0 |
| 25 | 0        | 0.812237 | 0 | 0 |
| 25 | 0.812237 | 1.83284  | 1 | 1 |
| 26 | 0        | 1.451084 | 0 | 0 |
| 26 | 1.451084 | 1.994928 | 1 | 1 |
| 27 | 0        | 2.54325  | 0 | 0 |
| 28 | 0        | 2.379713 | 0 | 1 |
| 29 | 0        | 1.401393 | 0 | 1 |
| 30 | 0        | 0.558292 | 0 | 0 |
| 30 | 0.558292 | 0.707891 | 1 | 0 |
| 31 | 0        | 1.605128 | 0 | 0 |
| 32 | 0        | 4.688097 | 0 | 1 |
| 33 | 0        | 0.105685 | 0 | 1 |

|    |          |          |   |   |
|----|----------|----------|---|---|
| 34 | 0        | 0.014239 | 0 | 1 |
| 35 | 0        | 4.300511 | 0 | 0 |
| 36 | 0        | 0.917781 | 0 | 1 |
| 37 | 0        | 4.063936 | 0 | 0 |
| 38 | 0        | 0.655462 | 0 | 0 |
| 39 | 0        | 0.070048 | 0 | 1 |
| 40 | 0        | 0.179629 | 0 | 1 |
| 41 | 0        | 0.262296 | 0 | 0 |
| 42 | 0        | 0.1      | 0 | 0 |
| 42 | 0.1      | 0.249283 | 1 | 1 |
| 43 | 0        | 1.551604 | 0 | 1 |
| 44 | 0        | 0.297423 | 0 | 0 |
| 45 | 0        | 0.36208  | 0 | 0 |
| 46 | 0        | 0.206831 | 0 | 0 |
| 46 | 0.206831 | 2.460592 | 1 | 1 |
| 47 | 0        | 3.416913 | 0 | 0 |
| 48 | 0        | 0.434893 | 0 | 0 |
| 48 | 0.434893 | 8        | 1 | 0 |
| 49 | 0        | 1.5904   | 0 | 0 |
| 50 | 0        | 0.251283 | 0 | 0 |
| 51 | 0        | 1.301945 | 0 | 1 |
| 52 | 0        | 2.416848 | 0 | 0 |
| 53 | 0        | 0.1      | 0 | 0 |
| 53 | 0.1      | 0.207586 | 1 | 1 |
| 54 | 0        | 1.502405 | 0 | 0 |
| 55 | 0        | 0.097199 | 0 | 1 |
| 56 | 0        | 0.122936 | 0 | 1 |
| 57 | 0        | 0.109011 | 0 | 1 |
| 58 | 0        | 0.758625 | 0 | 1 |
| 59 | 0        | 1.972103 | 0 | 1 |
| 60 | 0        | 0.124736 | 0 | 0 |
| 60 | 0.124736 | 0.826091 | 1 | 1 |
| 61 | 0        | 0.005626 | 0 | 0 |
| 62 | 0        | 0.237489 | 0 | 0 |
| 63 | 0        | 0.035225 | 0 | 1 |
| 64 | 0        | 0.1      | 0 | 0 |
| 64 | 0.1      | 0.109656 | 1 | 1 |
| 65 | 0        | 0.391504 | 0 | 1 |
| 66 | 0        | 1.979137 | 0 | 0 |
| 66 | 1.979137 | 2.404928 | 1 | 1 |
| 67 | 0        | 0.081246 | 0 | 0 |
| 68 | 0        | 0.095471 | 0 | 0 |
| 69 | 0        | 0.189492 | 0 | 1 |
| 70 | 0        | 0.187703 | 0 | 0 |
| 70 | 0.187703 | 2.022494 | 1 | 0 |
| 71 | 0        | 3.011062 | 0 | 0 |
| 71 | 3.011062 | 3.461384 | 1 | 1 |

|     |          |          |   |   |
|-----|----------|----------|---|---|
| 72  | 0        | 0.638815 | 0 | 0 |
| 73  | 0        | 3.561664 | 0 | 0 |
| 73  | 3.561664 | 4.256245 | 1 | 0 |
| 74  | 0        | 0.397912 | 0 | 1 |
| 75  | 0        | 2.560331 | 0 | 0 |
| 76  | 0        | 0.197822 | 0 | 0 |
| 77  | 0        | 1.184343 | 0 | 0 |
| 77  | 1.184343 | 6.651497 | 1 | 0 |
| 78  | 0        | 0.950809 | 0 | 1 |
| 79  | 0        | 0.09243  | 0 | 0 |
| 80  | 0        | 0.1      | 0 | 0 |
| 80  | 0.1      | 1.081251 | 1 | 1 |
| 81  | 0        | 1.405002 | 0 | 1 |
| 82  | 0        | 1.920956 | 0 | 0 |
| 83  | 0        | 0.83857  | 0 | 0 |
| 83  | 0.83857  | 2.897881 | 1 | 0 |
| 84  | 0        | 8        | 0 | 0 |
| 85  | 0        | 0.674558 | 0 | 0 |
| 86  | 0        | 0.1      | 0 | 0 |
| 86  | 0.1      | 2.220759 | 1 | 1 |
| 87  | 0        | 2.61324  | 0 | 0 |
| 87  | 2.61324  | 2.790553 | 1 | 0 |
| 88  | 0        | 0.27935  | 0 | 0 |
| 88  | 0.27935  | 1.339575 | 1 | 1 |
| 89  | 0        | 0.269858 | 0 | 0 |
| 89  | 0.269858 | 1.151457 | 1 | 1 |
| 90  | 0        | 2.804768 | 0 | 1 |
| 91  | 0        | 0.129917 | 0 | 0 |
| 92  | 0        | 0.039753 | 0 | 0 |
| 93  | 0        | 1.896744 | 0 | 0 |
| 94  | 0        | 3.221995 | 0 | 1 |
| 95  | 0        | 3.702427 | 0 | 0 |
| 95  | 3.702427 | 7.424701 | 1 | 0 |
| 96  | 0        | 0.820049 | 0 | 0 |
| 96  | 0.820049 | 1.682233 | 1 | 1 |
| 97  | 0        | 0.46775  | 0 | 1 |
| 98  | 0        | 0.1      | 0 | 0 |
| 98  | 0.1      | 1.656121 | 1 | 1 |
| 99  | 0        | 1.726738 | 0 | 0 |
| 99  | 1.726738 | 1.955092 | 1 | 1 |
| 100 | 0        | 2.591924 | 0 | 0 |
| 101 | 0        | 0.339738 | 0 | 1 |
| 102 | 0        | 0.854724 | 0 | 0 |
| 103 | 0        | 0.1      | 0 | 0 |
| 103 | 0.1      | 0.967594 | 1 | 1 |
| 104 | 0        | 2.312868 | 0 | 0 |
| 105 | 0        | 0.650281 | 0 | 0 |

|     |          |          |   |   |
|-----|----------|----------|---|---|
| 105 | 0.650281 | 1.481334 | 1 | 0 |
| 106 | 0        | 0.942085 | 0 | 0 |
| 107 | 0        | 1.640983 | 0 | 1 |
| 108 | 0        | 0.973325 | 0 | 0 |
| 108 | 0.973325 | 1.929648 | 1 | 0 |
| 109 | 0        | 4.730801 | 0 | 1 |
| 110 | 0        | 2.924211 | 0 | 0 |
| 110 | 2.924211 | 3.840257 | 1 | 1 |
| 111 | 0        | 0.843288 | 0 | 1 |
| 112 | 0        | 0.182056 | 0 | 0 |
| 113 | 0        | 1.497866 | 0 | 0 |
| 114 | 0        | 1.546523 | 0 | 1 |
| 115 | 0        | 2.701965 | 0 | 0 |
| 116 | 0        | 0.528231 | 0 | 1 |
| 117 | 0        | 0.44167  | 0 | 1 |
| 118 | 0        | 3.76162  | 0 | 0 |
| 118 | 3.76162  | 7.170348 | 1 | 1 |
| 119 | 0        | 0.1      | 0 | 0 |
| 119 | 0.1      | 0.131655 | 1 | 1 |
| 120 | 0        | 1.19972  | 0 | 0 |
| 120 | 1.19972  | 7.075313 | 1 | 0 |
| 121 | 0        | 2.322705 | 0 | 1 |
| 122 | 0        | 3.415633 | 0 | 0 |
| 122 | 3.415633 | 6.449775 | 1 | 1 |
| 123 | 0        | 0.105096 | 0 | 1 |
| 124 | 0        | 0.46036  | 0 | 0 |
| 125 | 0        | 4.555882 | 0 | 0 |
| 125 | 4.555882 | 4.686823 | 1 | 1 |
| 126 | 0        | 0.912501 | 0 | 0 |
| 127 | 0        | 4.461605 | 0 | 0 |
| 128 | 0        | 0.543111 | 0 | 1 |
| 129 | 0        | 1.042337 | 0 | 0 |
| 130 | 0        | 0.640251 | 0 | 1 |
| 131 | 0        | 1.030599 | 0 | 1 |
| 132 | 0        | 3.781638 | 0 | 0 |
| 133 | 0        | 3.006137 | 0 | 0 |
| 134 | 0        | 3.815443 | 0 | 0 |
| 135 | 0        | 3.845032 | 0 | 0 |
| 135 | 3.845032 | 6.921908 | 1 | 1 |
| 136 | 0        | 1.936834 | 0 | 1 |
| 137 | 0        | 1.318778 | 0 | 1 |
| 138 | 0        | 1.087904 | 0 | 0 |
| 139 | 0        | 1.25713  | 0 | 1 |
| 140 | 0        | 0.041261 | 0 | 0 |
| 140 | 0.041261 | 6.02298  | 1 | 1 |
| 141 | 0        | 0.203831 | 0 | 0 |
| 141 | 0.203831 | 2.00624  | 1 | 1 |

|     |          |          |   |   |
|-----|----------|----------|---|---|
| 142 | 0        | 1.128684 | 0 | 0 |
| 143 | 0        | 1.549787 | 0 | 0 |
| 144 | 0        | 1.651245 | 0 | 0 |
| 145 | 0        | 0.1      | 0 | 0 |
| 145 | 0.1      | 0.981883 | 1 | 1 |
| 146 | 0        | 0.83341  | 0 | 1 |
| 147 | 0        | 2.088555 | 0 | 1 |
| 148 | 0        | 3.698402 | 0 | 1 |
| 149 | 0        | 1.940116 | 0 | 0 |
| 150 | 0        | 1.008504 | 0 | 0 |
| 150 | 1.008504 | 3.858951 | 1 | 1 |
| 151 | 0        | 0.719391 | 0 | 0 |
| 151 | 0.719391 | 2.053054 | 1 | 1 |
| 152 | 0        | 0.82751  | 0 | 0 |
| 152 | 0.82751  | 1.740245 | 1 | 1 |
| 153 | 0        | 1.933317 | 0 | 1 |
| 154 | 0        | 1.966936 | 0 | 0 |
| 154 | 1.966936 | 3.246491 | 1 | 1 |
| 155 | 0        | 4.255906 | 0 | 1 |
| 156 | 0        | 1.165177 | 0 | 0 |
| 156 | 1.165177 | 4.163577 | 1 | 0 |
| 157 | 0        | 0.374318 | 0 | 0 |
| 158 | 0        | 0.173114 | 0 | 0 |
| 159 | 0        | 0.862992 | 0 | 1 |
| 160 | 0        | 6.665531 | 0 | 1 |
| 161 | 0        | 0.858976 | 0 | 0 |
| 161 | 0.858976 | 1.228195 | 1 | 1 |
| 162 | 0        | 0.554485 | 0 | 1 |
| 163 | 0        | 1.755679 | 0 | 0 |
| 164 | 0        | 2.482032 | 0 | 0 |
| 165 | 0        | 2.517516 | 0 | 1 |
| 166 | 0        | 4.591295 | 0 | 0 |
| 166 | 4.591295 | 5.451292 | 1 | 1 |
| 167 | 0        | 1.663618 | 0 | 0 |
| 168 | 0        | 1.480571 | 0 | 0 |
| 168 | 1.480571 | 1.588392 | 1 | 0 |
| 169 | 0        | 0.321205 | 0 | 0 |
| 170 | 0        | 3.399853 | 0 | 0 |
| 171 | 0        | 5.989915 | 0 | 1 |
| 172 | 0        | 1.57224  | 0 | 1 |
| 173 | 0        | 2.47005  | 0 | 1 |
| 174 | 0        | 1.478298 | 0 | 0 |
| 174 | 1.478298 | 2.650251 | 1 | 1 |
| 175 | 0        | 2.481867 | 0 | 0 |
| 175 | 2.481867 | 3.1353   | 1 | 0 |
| 176 | 0        | 4.204619 | 0 | 0 |
| 176 | 4.204619 | 4.223562 | 1 | 1 |

|     |          |          |   |   |
|-----|----------|----------|---|---|
| 177 | 0        | 1.952577 | 0 | 0 |
| 177 | 1.952577 | 2.836585 | 1 | 0 |
| 178 | 0        | 1.038911 | 0 | 1 |
| 179 | 0        | 0.967637 | 0 | 1 |
| 180 | 0        | 0.135023 | 0 | 0 |
| 180 | 0.135023 | 0.804021 | 1 | 0 |
| 181 | 0        | 1.101861 | 0 | 0 |
| 181 | 1.101861 | 3.715479 | 1 | 0 |
| 182 | 0        | 1.205377 | 0 | 0 |
| 182 | 1.205377 | 1.406904 | 1 | 0 |
| 183 | 0        | 0.088814 | 0 | 1 |
| 184 | 0        | 1.564419 | 0 | 0 |
| 184 | 1.564419 | 2.529253 | 1 | 1 |
| 185 | 0        | 2.616168 | 0 | 0 |
| 186 | 0        | 0.469267 | 0 | 0 |
| 187 | 0        | 2.53833  | 0 | 1 |
| 188 | 0        | 0.380857 | 0 | 0 |
| 188 | 0.380857 | 0.811941 | 1 | 1 |
| 189 | 0        | 4.027232 | 0 | 0 |
| 190 | 0        | 0.204413 | 0 | 1 |
| 191 | 0        | 0.834421 | 0 | 1 |
| 192 | 0        | 0.323216 | 0 | 0 |
| 192 | 0.323216 | 5.572668 | 1 | 1 |
| 193 | 0        | 0.155549 | 0 | 0 |
| 194 | 0        | 6.123144 | 0 | 0 |
| 195 | 0        | 3.015078 | 0 | 1 |
| 196 | 0        | 1.551555 | 0 | 1 |
| 197 | 0        | 0.096787 | 0 | 1 |
| 198 | 0        | 0.1      | 0 | 0 |
| 198 | 0.1      | 2.102758 | 1 | 1 |
| 199 | 0        | 0.539505 | 0 | 1 |
| 200 | 0        | 1.053415 | 0 | 0 |
| 201 | 0        | 0.279238 | 0 | 0 |
| 201 | 0.279238 | 0.505715 | 1 | 1 |
| 202 | 0        | 0.289611 | 0 | 0 |
| 202 | 0.289611 | 2.541075 | 1 | 1 |
| 203 | 0        | 3.015176 | 0 | 0 |
| 203 | 3.015176 | 4.063171 | 1 | 1 |
| 204 | 0        | 2.035153 | 0 | 1 |
| 205 | 0        | 0.013314 | 0 | 1 |
| 206 | 0        | 0.133123 | 0 | 0 |
| 206 | 0.133123 | 1.7443   | 1 | 1 |
| 207 | 0        | 2.096071 | 0 | 1 |
| 208 | 0        | 1.23793  | 0 | 0 |
| 209 | 0        | 3.096976 | 0 | 1 |
| 210 | 0        | 0.90117  | 0 | 1 |
| 211 | 0        | 0.1      | 0 | 0 |

|     |          |          |   |   |
|-----|----------|----------|---|---|
| 211 | 0.1      | 0.641977 | 1 | 1 |
| 212 | 0        | 2.004333 | 0 | 1 |
| 213 | 0        | 2.23056  | 0 | 0 |
| 213 | 2.23056  | 2.275409 | 1 | 1 |
| 214 | 0        | 0.669023 | 0 | 1 |
| 215 | 0        | 1.174847 | 0 | 1 |
| 216 | 0        | 3.89544  | 0 | 0 |
| 216 | 3.89544  | 4.799795 | 1 | 1 |
| 217 | 0        | 8        | 0 | 0 |
| 218 | 0        | 4.536639 | 0 | 1 |
| 219 | 0        | 0.45499  | 0 | 0 |
| 219 | 0.45499  | 0.984505 | 1 | 1 |
| 220 | 0        | 0.014048 | 0 | 1 |
| 221 | 0        | 0.368664 | 0 | 0 |
| 221 | 0.368664 | 1.375538 | 1 | 0 |
| 222 | 0        | 2.782528 | 0 | 0 |
| 223 | 0        | 1.073237 | 0 | 0 |
| 224 | 0        | 2.037212 | 0 | 0 |
| 224 | 2.037212 | 3.265087 | 1 | 1 |
| 225 | 0        | 5.249986 | 0 | 0 |
| 225 | 5.249986 | 5.567776 | 1 | 1 |
| 226 | 0        | 1.681983 | 0 | 0 |
| 227 | 0        | 2.062528 | 0 | 1 |
| 228 | 0        | 1.499152 | 0 | 0 |
| 229 | 0        | 2.135943 | 0 | 1 |
| 230 | 0        | 1.017789 | 0 | 0 |
| 230 | 1.017789 | 2.205545 | 1 | 1 |
| 231 | 0        | 0.355968 | 0 | 0 |
| 232 | 0        | 1.79375  | 0 | 1 |
| 233 | 0        | 1.192807 | 0 | 0 |
| 234 | 0        | 1.139085 | 0 | 0 |
| 234 | 1.139085 | 3.493505 | 1 | 1 |
| 235 | 0        | 0.191821 | 0 | 1 |
| 236 | 0        | 2.648943 | 0 | 0 |
| 237 | 0        | 0.065779 | 0 | 0 |
| 238 | 0        | 2.400175 | 0 | 1 |
| 239 | 0        | 0.102311 | 0 | 1 |
| 240 | 0        | 3.182944 | 0 | 0 |
| 240 | 3.182944 | 3.855166 | 1 | 1 |
| 241 | 0        | 3.308419 | 0 | 0 |
| 241 | 3.308419 | 5.411197 | 1 | 0 |
| 242 | 0        | 0.824484 | 0 | 0 |
| 243 | 0        | 2.269556 | 0 | 0 |
| 243 | 2.269556 | 4.399695 | 1 | 0 |
| 244 | 0        | 6.64665  | 0 | 0 |
| 245 | 0        | 0.617025 | 0 | 1 |
| 246 | 0        | 4.226712 | 0 | 0 |

|     |          |          |   |   |
|-----|----------|----------|---|---|
| 247 | 0        | 3.778152 | 0 | 1 |
| 248 | 0        | 0.1      | 0 | 0 |
| 248 | 0.1      | 0.777425 | 1 | 0 |
| 249 | 0        | 0.131748 | 0 | 1 |
| 250 | 0        | 0.498246 | 0 | 1 |
| 251 | 0        | 4.114644 | 0 | 0 |
| 252 | 0        | 0.1      | 0 | 0 |
| 252 | 0.1      | 0.147996 | 1 | 1 |
| 253 | 0        | 0.057881 | 0 | 1 |
| 254 | 0        | 4.24928  | 0 | 0 |
| 254 | 4.24928  | 6.706131 | 1 | 1 |
| 255 | 0        | 2.253661 | 0 | 0 |
| 255 | 2.253661 | 4.613796 | 1 | 0 |
| 256 | 0        | 0.615407 | 0 | 1 |
| 257 | 0        | 2.144697 | 0 | 1 |
| 258 | 0        | 2.197396 | 0 | 0 |
| 259 | 0        | 0.441765 | 0 | 0 |
| 259 | 0.441765 | 1.825486 | 1 | 1 |
| 260 | 0        | 4.791369 | 0 | 1 |
| 261 | 0        | 1.09423  | 0 | 1 |
| 262 | 0        | 2.043823 | 0 | 0 |
| 262 | 2.043823 | 3.636223 | 1 | 1 |
| 263 | 0        | 4.395719 | 0 | 0 |
| 264 | 0        | 1.34017  | 0 | 1 |
| 265 | 0        | 0.547886 | 0 | 0 |
| 265 | 0.547886 | 2.998441 | 1 | 0 |
| 266 | 0        | 0.41005  | 0 | 1 |
| 267 | 0        | 0.694604 | 0 | 1 |
| 268 | 0        | 0.2934   | 0 | 0 |
| 268 | 0.2934   | 2.1344   | 1 | 1 |
| 269 | 0        | 0.5324   | 0 | 0 |
| 269 | 0.5324   | 4.066098 | 1 | 1 |
| 270 | 0        | 3.351162 | 0 | 1 |
| 271 | 0        | 3.010248 | 0 | 0 |
| 272 | 0        | 0.152161 | 0 | 0 |
| 273 | 0        | 0.944343 | 0 | 1 |
| 274 | 0        | 0.454432 | 0 | 0 |
| 275 | 0        | 0.1      | 0 | 0 |
| 275 | 0.1      | 1.389372 | 1 | 0 |
| 276 | 0        | 1.01462  | 0 | 1 |
| 277 | 0        | 0.150694 | 0 | 1 |
| 278 | 0        | 0.359121 | 0 | 1 |
| 279 | 0        | 1.71696  | 0 | 0 |
| 280 | 0        | 1.982525 | 0 | 0 |
| 281 | 0        | 2.666697 | 0 | 0 |
| 282 | 0        | 2.321901 | 0 | 0 |
| 283 | 0        | 1.154987 | 0 | 1 |



|     |          |          |   |   |
|-----|----------|----------|---|---|
| 284 | 0        | 8        | 0 | 0 |
| 285 | 0        | 0.741399 | 0 | 1 |
| 286 | 0        | 0.275719 | 0 | 0 |
| 287 | 0        | 0.030741 | 0 | 0 |
| 287 | 0.030741 | 2.393937 | 1 | 0 |
| 288 | 0        | 0.242447 | 0 | 1 |
| 289 | 0        | 3.149074 | 0 | 0 |
| 290 | 0        | 0.369884 | 0 | 1 |
| 291 | 0        | 4.853134 | 0 | 1 |
| 292 | 0        | 1.583888 | 0 | 0 |
| 293 | 0        | 0.975816 | 0 | 0 |
| 294 | 0        | 1.180693 | 0 | 0 |
| 295 | 0        | 7.442904 | 0 | 0 |
| 296 | 0        | 0.721666 | 0 | 0 |
| 296 | 0.721666 | 0.730895 | 1 | 0 |
| 297 | 0        | 1.173784 | 0 | 0 |
| 298 | 0        | 0.834188 | 0 | 0 |
| 298 | 0.834188 | 3.064333 | 1 | 1 |
| 299 | 0        | 0.498589 | 0 | 0 |
| 300 | 0        | 0.859221 | 0 | 1 |
| 301 | 0        | 0.668216 | 0 | 0 |
| 302 | 0        | 0.085151 | 0 | 0 |
| 303 | 0        | 0.563973 | 0 | 0 |
| 303 | 0.563973 | 0.936975 | 1 | 1 |
| 304 | 0        | 1.338023 | 0 | 1 |
| 305 | 0        | 0.182353 | 0 | 0 |
| 306 | 0        | 1.240142 | 0 | 1 |
| 307 | 0        | 1.93537  | 0 | 0 |
| 308 | 0        | 1.022148 | 0 | 0 |
| 309 | 0        | 1.45191  | 0 | 0 |
| 309 | 1.45191  | 1.95972  | 1 | 1 |
| 310 | 0        | 1.24784  | 0 | 1 |
| 311 | 0        | 0.325967 | 0 | 0 |
| 312 | 0        | 0.041857 | 0 | 0 |
| 313 | 0        | 1.773097 | 0 | 0 |
| 314 | 0        | 2.318671 | 0 | 0 |
| 314 | 2.318671 | 3.846693 | 1 | 1 |
| 315 | 0        | 3.505912 | 0 | 0 |
| 316 | 0        | 0.1      | 0 | 0 |
| 316 | 0.1      | 1.502625 | 1 | 1 |
| 317 | 0        | 8        | 0 | 0 |
| 318 | 0        | 1.348611 | 0 | 0 |
| 319 | 0        | 0.045093 | 0 | 0 |
| 320 | 0        | 3.197516 | 0 | 0 |
| 321 | 0        | 4.666259 | 0 | 1 |
| 322 | 0        | 0.061821 | 0 | 0 |
| 323 | 0        | 0.661229 | 0 | 0 |

|     |          |          |   |   |
|-----|----------|----------|---|---|
| 323 | 0.661229 | 4.873028 | 1 | 1 |
| 324 | 0        | 1.988265 | 0 | 0 |
| 325 | 0        | 1.143579 | 0 | 0 |
| 326 | 0        | 0.63837  | 0 | 0 |
| 326 | 0.63837  | 1.258304 | 1 | 1 |
| 327 | 0        | 0.255637 | 0 | 0 |
| 327 | 0.255637 | 1.089816 | 1 | 1 |
| 328 | 0        | 1.593219 | 0 | 0 |
| 329 | 0        | 1.607228 | 0 | 0 |
| 329 | 1.607228 | 2.485468 | 1 | 1 |
| 330 | 0        | 4.408325 | 0 | 0 |
| 331 | 0        | 1.224741 | 0 | 0 |
| 331 | 1.224741 | 4.124869 | 1 | 1 |
| 332 | 0        | 1.369909 | 0 | 1 |
| 333 | 0        | 2.765766 | 0 | 0 |
| 334 | 0        | 0.730279 | 0 | 0 |
| 335 | 0        | 1.854962 | 0 | 1 |
| 336 | 0        | 1.134991 | 0 | 1 |
| 337 | 0        | 1.232759 | 0 | 0 |
| 338 | 0        | 0.150515 | 0 | 1 |
| 339 | 0        | 1.753915 | 0 | 0 |
| 339 | 1.753915 | 1.834865 | 1 | 0 |
| 340 | 0        | 1.438749 | 0 | 1 |
| 341 | 0        | 1.155259 | 0 | 0 |
| 342 | 0        | 0.021255 | 0 | 0 |
| 342 | 0.021255 | 0.073396 | 1 | 1 |
| 343 | 0        | 0.42574  | 0 | 0 |
| 344 | 0        | 0.819191 | 0 | 1 |
| 345 | 0        | 3.835453 | 0 | 0 |
| 345 | 3.835453 | 5.513075 | 1 | 1 |
| 346 | 0        | 0.948338 | 0 | 0 |
| 346 | 0.948338 | 1.418044 | 1 | 1 |
| 347 | 0        | 5.198247 | 0 | 0 |
| 348 | 0        | 1.181085 | 0 | 0 |
| 349 | 0        | 2.869005 | 0 | 0 |
| 350 | 0        | 2.24464  | 0 | 0 |
| 350 | 2.24464  | 4.354616 | 1 | 1 |
| 351 | 0        | 5.200735 | 0 | 0 |
| 352 | 0        | 0.887397 | 0 | 0 |
| 352 | 0.887397 | 1.335617 | 1 | 1 |
| 353 | 0        | 0.755016 | 0 | 1 |
| 354 | 0        | 2.400672 | 0 | 0 |
| 355 | 0        | 0.602796 | 0 | 0 |
| 356 | 0        | 8        | 0 | 0 |
| 357 | 0        | 0.618431 | 0 | 0 |
| 358 | 0        | 0.713542 | 0 | 1 |
| 359 | 0        | 4.328447 | 0 | 1 |

|     |          |          |   |   |
|-----|----------|----------|---|---|
| 360 | 0        | 0.1      | 0 | 0 |
| 360 | 0.1      | 0.942308 | 1 | 1 |
| 361 | 0        | 0.717851 | 0 | 0 |
| 361 | 0.717851 | 0.897841 | 1 | 1 |
| 362 | 0        | 0.375765 | 0 | 0 |
| 363 | 0        | 2.511629 | 0 | 1 |
| 364 | 0        | 0.513582 | 0 | 0 |
| 365 | 0        | 1.248236 | 0 | 0 |
| 365 | 1.248236 | 3.089722 | 1 | 0 |
| 366 | 0        | 0.230626 | 0 | 0 |
| 366 | 0.230626 | 1.847784 | 1 | 0 |
| 367 | 0        | 0.458367 | 0 | 0 |
| 367 | 0.458367 | 1.527668 | 1 | 0 |
| 368 | 0        | 0.765377 | 0 | 1 |
| 369 | 0        | 1.073787 | 0 | 0 |
| 370 | 0        | 0.025704 | 0 | 1 |
| 371 | 0        | 2.246143 | 0 | 0 |
| 371 | 2.246143 | 2.866053 | 1 | 0 |
| 372 | 0        | 1.01457  | 0 | 0 |
| 373 | 0        | 4.636675 | 0 | 0 |
| 374 | 0        | 6.170609 | 0 | 0 |
| 375 | 0        | 3.180858 | 0 | 0 |
| 376 | 0        | 2.647782 | 0 | 0 |
| 376 | 2.647782 | 5.502454 | 1 | 0 |
| 377 | 0        | 3.201605 | 0 | 1 |
| 378 | 0        | 3.448178 | 0 | 0 |
| 379 | 0        | 3.800865 | 0 | 0 |
| 380 | 0        | 1.222962 | 0 | 0 |
| 380 | 1.222962 | 5.661375 | 1 | 1 |
| 381 | 0        | 2.244291 | 0 | 1 |
| 382 | 0        | 3.362639 | 0 | 0 |
| 383 | 0        | 0.199202 | 0 | 1 |
| 384 | 0        | 0.437219 | 0 | 1 |
| 385 | 0        | 0.524369 | 0 | 0 |
| 386 | 0        | 1.108378 | 0 | 1 |
| 387 | 0        | 1.374777 | 0 | 0 |
| 388 | 0        | 8        | 0 | 0 |
| 389 | 0        | 0.501318 | 0 | 1 |
| 390 | 0        | 1.363873 | 0 | 1 |
| 391 | 0        | 2.145802 | 0 | 1 |
| 392 | 0        | 0.293695 | 0 | 1 |
| 393 | 0        | 1.032459 | 0 | 1 |
| 394 | 0        | 0.084885 | 0 | 0 |
| 394 | 0.084885 | 1.495478 | 1 | 1 |
| 395 | 0        | 0.179159 | 0 | 0 |
| 396 | 0        | 1.846813 | 0 | 0 |
| 397 | 0        | 1.871746 | 0 | 1 |

|     |          |          |   |   |
|-----|----------|----------|---|---|
| 398 | 0        | 3.44257  | 0 | 0 |
| 399 | 0        | 0.295766 | 0 | 0 |
| 400 | 0        | 3.060039 | 0 | 1 |
| 401 | 0        | 0.537904 | 0 | 0 |
| 402 | 0        | 1.828941 | 0 | 0 |
| 403 | 0        | 0.538443 | 0 | 0 |
| 403 | 0.538443 | 0.716714 | 1 | 1 |
| 404 | 0        | 2.263004 | 0 | 0 |
| 405 | 0        | 0.778848 | 0 | 1 |
| 406 | 0        | 3.377662 | 0 | 0 |
| 406 | 3.377662 | 5.615844 | 1 | 1 |
| 407 | 0        | 3.252834 | 0 | 1 |
| 408 | 0        | 3.811414 | 0 | 0 |
| 408 | 3.811414 | 5.237349 | 1 | 1 |
| 409 | 0        | 0.519245 | 0 | 0 |
| 409 | 0.519245 | 4.348236 | 1 | 1 |
| 410 | 0        | 2.384788 | 0 | 1 |
| 411 | 0        | 1.715624 | 0 | 1 |
| 412 | 0        | 0.260638 | 0 | 0 |
| 412 | 0.260638 | 4.076712 | 1 | 0 |
| 413 | 0        | 1.351249 | 0 | 0 |
| 413 | 1.351249 | 2.092672 | 1 | 1 |
| 414 | 0        | 0.096886 | 0 | 1 |
| 415 | 0        | 0.961578 | 0 | 0 |
| 416 | 0        | 0.1      | 0 | 0 |
| 416 | 0.1      | 0.750101 | 1 | 1 |
| 417 | 0        | 1.02379  | 0 | 0 |
| 418 | 0        | 0.085164 | 0 | 0 |
| 419 | 0        | 3.405623 | 0 | 1 |
| 420 | 0        | 0.095811 | 0 | 1 |
| 421 | 0        | 0.965976 | 0 | 0 |
| 422 | 0        | 0.754894 | 0 | 0 |
| 422 | 0.754894 | 2.200376 | 1 | 0 |
| 423 | 0        | 0.660234 | 0 | 0 |
| 424 | 0        | 0.404717 | 0 | 0 |
| 425 | 0        | 1.148589 | 0 | 0 |
| 425 | 1.148589 | 4.913972 | 1 | 0 |
| 426 | 0        | 0.741024 | 0 | 1 |
| 427 | 0        | 0.248877 | 0 | 0 |
| 428 | 0        | 5.120874 | 0 | 0 |
| 429 | 0        | 0.90809  | 0 | 0 |
| 430 | 0        | 1.328731 | 0 | 0 |
| 431 | 0        | 1.402384 | 0 | 0 |
| 431 | 1.402384 | 1.961513 | 1 | 1 |
| 432 | 0        | 2.496895 | 0 | 0 |
| 433 | 0        | 0.248436 | 0 | 0 |
| 434 | 0        | 0.566283 | 0 | 1 |

|     |          |          |   |   |
|-----|----------|----------|---|---|
| 435 | 0        | 1.646923 | 0 | 0 |
| 436 | 0        | 1.522527 | 0 | 0 |
| 437 | 0        | 0.854278 | 0 | 0 |
| 437 | 0.854278 | 2.105246 | 1 | 1 |
| 438 | 0        | 1.45042  | 0 | 0 |
| 439 | 0        | 2.020479 | 0 | 0 |
| 439 | 2.020479 | 8        | 1 | 0 |
| 440 | 0        | 4.231064 | 0 | 0 |
| 441 | 0        | 0.119081 | 0 | 1 |
| 442 | 0        | 1.013076 | 0 | 0 |
| 443 | 0        | 0.230498 | 0 | 0 |
| 444 | 0        | 1.864723 | 0 | 1 |
| 445 | 0        | 0.112883 | 0 | 0 |
| 446 | 0        | 2.180274 | 0 | 1 |
| 447 | 0        | 5.841896 | 0 | 0 |
| 447 | 5.841896 | 6.251126 | 1 | 1 |
| 448 | 0        | 2.995328 | 0 | 1 |
| 449 | 0        | 0.293943 | 0 | 0 |
| 449 | 0.293943 | 0.517679 | 1 | 1 |
| 450 | 0        | 2.380289 | 0 | 1 |
| 451 | 0        | 0.1      | 0 | 0 |
| 451 | 0.1      | 0.200478 | 1 | 1 |
| 452 | 0        | 0.1      | 0 | 0 |
| 452 | 0.1      | 1.188436 | 1 | 1 |
| 453 | 0        | 0.55403  | 0 | 0 |
| 453 | 0.55403  | 2.895804 | 1 | 1 |
| 454 | 0        | 0.657651 | 0 | 0 |
| 455 | 0        | 1.060006 | 0 | 0 |
| 455 | 1.060006 | 1.500906 | 1 | 0 |
| 456 | 0        | 3.293253 | 0 | 0 |
| 456 | 3.293253 | 5.074529 | 1 | 1 |
| 457 | 0        | 0.485126 | 0 | 1 |
| 458 | 0        | 1.555227 | 0 | 0 |
| 459 | 0        | 5.193458 | 0 | 1 |
| 460 | 0        | 3.29366  | 0 | 1 |
| 461 | 0        | 2.085121 | 0 | 0 |
| 461 | 2.085121 | 3.601636 | 1 | 1 |
| 462 | 0        | 1.877462 | 0 | 0 |
| 463 | 0        | 1.125621 | 0 | 0 |
| 464 | 0        | 5.294273 | 0 | 0 |
| 464 | 5.294273 | 6.617702 | 1 | 1 |
| 465 | 0        | 0.043611 | 0 | 0 |
| 465 | 0.043611 | 1.74569  | 1 | 1 |
| 466 | 0        | 0.136623 | 0 | 1 |
| 467 | 0        | 0.187542 | 0 | 0 |
| 467 | 0.187542 | 2.048286 | 1 | 0 |
| 468 | 0        | 2.064512 | 0 | 0 |

|     |          |          |   |   |
|-----|----------|----------|---|---|
| 469 | 0        | 0.797596 | 0 | 1 |
| 470 | 0        | 0.929505 | 0 | 1 |
| 471 | 0        | 0.603057 | 0 | 1 |
| 472 | 0        | 2.935635 | 0 | 0 |
| 472 | 2.935635 | 7.683348 | 1 | 0 |
| 473 | 0        | 0.1      | 0 | 0 |
| 473 | 0.1      | 0.293817 | 1 | 0 |
| 474 | 0        | 0.179635 | 0 | 0 |
| 474 | 0.179635 | 1.528564 | 1 | 1 |
| 475 | 0        | 0.890593 | 0 | 1 |
| 476 | 0        | 1.731763 | 0 | 0 |
| 477 | 0        | 2.509008 | 0 | 0 |
| 478 | 0        | 0.096382 | 0 | 0 |
| 478 | 0.096382 | 2.197587 | 1 | 1 |
| 479 | 0        | 0.82263  | 0 | 1 |
| 480 | 0        | 0.638577 | 0 | 1 |
| 481 | 0        | 2.36006  | 0 | 0 |
| 481 | 2.36006  | 6.179273 | 1 | 0 |
| 482 | 0        | 1.064445 | 0 | 0 |
| 483 | 0        | 1.908996 | 0 | 0 |
| 483 | 1.908996 | 2.197416 | 1 | 0 |
| 484 | 0        | 0.298029 | 0 | 0 |
| 484 | 0.298029 | 3.467426 | 1 | 1 |
| 485 | 0        | 2.300263 | 0 | 0 |
| 486 | 0        | 0.004333 | 0 | 0 |
| 487 | 0        | 7.839842 | 0 | 0 |
| 488 | 0        | 1.230761 | 0 | 1 |
| 489 | 0        | 2.125506 | 0 | 0 |
| 489 | 2.125506 | 2.355832 | 1 | 1 |
| 490 | 0        | 3.875174 | 0 | 0 |
| 490 | 3.875174 | 3.989942 | 1 | 0 |
| 491 | 0        | 2.353006 | 0 | 0 |
| 491 | 2.353006 | 7.046865 | 1 | 0 |
| 492 | 0        | 0.015644 | 0 | 0 |
| 493 | 0        | 0.444291 | 0 | 0 |
| 494 | 0        | 0.341597 | 0 | 0 |
| 494 | 0.341597 | 2.154283 | 1 | 1 |
| 495 | 0        | 5.66293  | 0 | 0 |
| 496 | 0        | 0.1      | 0 | 0 |
| 496 | 0.1      | 0.532897 | 1 | 1 |
| 497 | 0        | 3.71858  | 0 | 0 |
| 498 | 0        | 0.870717 | 0 | 0 |
| 499 | 0        | 0.088559 | 0 | 1 |
| 500 | 0        | 0.727783 | 0 | 1 |
